# Supplementary material for: A favourable prognostic marker for EGFR mutant non-small cell lung cancer: immunohistochemical analysis of MUC5B
Source: HighWire-hosted journal article supplement (doi:10.1136/bmjopen-2015-008366), 2015-07-01
Supplement: bmjopen-2015-008366supp.pdf [file bmjopen-2015-008366supp.pdf]

## **Supplementary Methods**

Transgenic mice were generated as previously described.[6] Mice were maintained according to protocols approved by the Institutional Animal Care and Use Committee at the Cincinnati Children's Hospital Medical Center. Mice were housed in a pathogen-free barrier facility in humidity and temperature-controlled rooms on a 12:12 h light/dark cycle, allowed food and water *ad libitum*.

Figure S1.

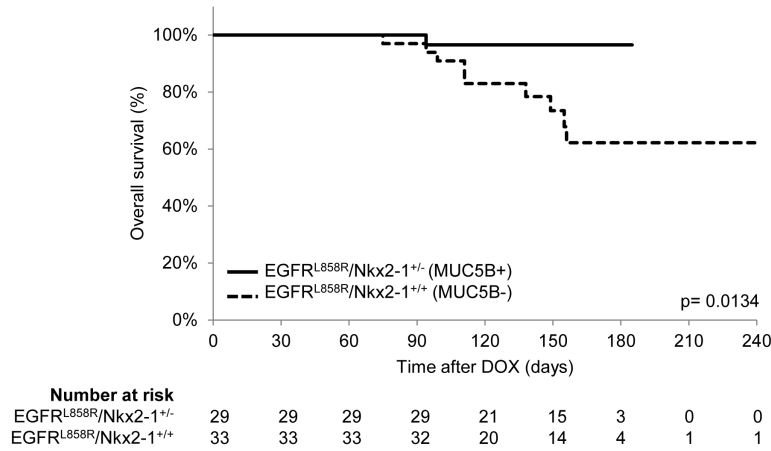

**Figure S1. Kaplan-Meier analysis of overall survival in *EGFR*-mutant NSCLC mice**

EGFR<sup>L858R</sup>/Nkx2-1<sup>+/-</sup> mice whose lung tumors express MUC5B significantly survived longer than EGFR<sup>L858R</sup>/Nkx2-1<sup>+/+</sup> mice whose lung tumors lack MUC5B (p=0.0134). DOX (doxycycline) administration induces mutant *EGFR* (EGFR<sup>L858R</sup>) in lung epithelium.

**Table S1. Association with Clinicopathological Data and the Expression of MUC5B of Patients with EGFR Wild Type NSCLC**

| Parameters                      | MUC5B           |                        |                        | P-value |
|---------------------------------|-----------------|------------------------|------------------------|---------|
|                                 | Total<br>(n=81) | Negative (-)<br>(n=52) | Positive (+)<br>(n=29) |         |
| Median age (range, years)       | 67.7(32-90)     | 67.1(32-90)            | 68.8(41-79)            | 0.2954  |
| Gender                          |                 |                        |                        |         |
| Male                            | 68(84%)         | 45(56%)                | 23(28%)                |         |
| Female                          | 13(16%)         | 7(9%)                  | 6(7%)                  | 0.5934  |
| Smoking status                  |                 |                        |                        |         |
| Non-smoker                      | 12(15%)         | 8(10%)                 | 4(5%)                  |         |
| Smoker                          | 69(85%)         | 44(54%)                | 25(31%)                | 0.8467  |
| Histological type               |                 |                        |                        |         |
| Adenocarcinoma: Bronchoalveolar | 8(10%)          | 5(6%)                  | 3(4%)                  |         |
| Adenocarcinoma                  | 49(60%)         | 24(30%)                | 25(31%)                |         |
| Squamous cell carcinoma         | 24(30%)         | 23(28%)                | 1(1%)                  | 0.0013  |
| Median tumor size (range, mm)   | 37.8(10-120)    | 36.2(10-120)           | 40.7(14-80)            | 0.1661  |
| Degree of differentiation       |                 |                        |                        |         |
| Well                            | 20(25%)         | 13(16%)                | 7(9%)                  |         |
| Moderately                      | 42(52%)         | 24(30%)                | 18(22%)                |         |
| Poorly                          | 17(21%)         | 14(17%)                | 3(4%)                  | 0.186   |
| MD                              | 2(2%)           | 1(1%)                  | 1(1%)                  |         |
| Stage                           |                 |                        |                        |         |
| IA/IB                           | 35(43%)         | 26(32%)                | 9(11%)                 |         |
| IIA/IIB                         | 26(32%)         | 12(15%)                | 14(17%)                |         |
| IIIA/IIIB                       | 20(25%)         | 14(17%)                | 6(7%)                  | 0.0631  |
| Tumor status                    |                 |                        |                        |         |
| T1-2                            | 68(84%)         | 42(52%)                | 26(32%)                |         |
| T3-4                            | 13(16%)         | 10(12%)                | 3(4%)                  | 0.3599  |
| Nodal status                    |                 |                        |                        |         |
| N0                              | 50(62%)         | 33(41%)                | 17(21%)                |         |
| N1-3                            | 31(38%)         | 19(23%)                | 12(15%)                | 0.6674  |
| Lymphatic invasion              |                 |                        |                        |         |
| Negative                        | 21(26%)         | 13(16%)                | 8(10%)                 |         |
| Positive                        | 60(74%)         | 39(48%)                | 21(26%)                | 0.1165  |
| Venous invasion                 |                 |                        |                        |         |

|                       |         |         |         |        |
|-----------------------|---------|---------|---------|--------|
| Negative              | 31(38%) | 19(23%) | 12(15%) |        |
| Positive              | 50(62%) | 33(41%) | 17(21%) | 0.6674 |
| Adjuvant chemotherapy |         |         |         |        |
| Yes                   | 52(64%) | 33(41%) | 19(23%) |        |
| No                    | 29(36%) | 19(23%) | 10(12%) | 0.7057 |

---

Definition of abbreviations: NSCLC = non-small cell lung cancer; MD = missing data.

\* Data are median (range) or number (%) unless otherwise stated.

**Table S2. Univariate Analysis for OS and RFS in EGFR Wild Type NSCLC Patients**

|                                                | <b>OS</b> | <b>RFS</b> |
|------------------------------------------------|-----------|------------|
| Age                                            | 0.6803    | 0.84       |
| Gender (male vs female)                        | 0.1194    | 0.4276     |
| Smoking (no vs yes)                            | 0.041     | 0.0744     |
| MUC5B (positive vs negative)                   | 0.9754    | 0.4624     |
| Tumor size                                     | 0.9915    | 0.7123     |
| Histological type (adeno vs sq)*               | 0.4381    | 0.2378     |
| Differentiation (well vs moderately vs poorly) | 0.0597    | 0.0722     |
| Stage I vs Stage II/III                        | 0.0346    | 0.2792     |
| Lymphatic invasion (negative vs positive)      | 0.1568    | 0.0284     |
| Venous invasion (negative vs positive)         | 0.0341    | 0.0338     |
| Adjuvant chemotherapy (yes or no)              | 0.026     | 0.1639     |

Definition of abbreviations: NSCLC = non-small cell lung cancer; OS = overall survival; RFS = relapse-free survival; adeno = adenocarcinoma; sq = squamous cell carcinoma.

\*Data are p-values by Kaplan-Meier analysis.

**Table S3. Association of MUC5B with Prognosis in Multiple Cancers**

|   | Author                          | Year | Species | Organ   | Sample size (n) | Objective                                                                                                           | Analysis Method                                                               | Result (MUC5B Positive)                                                                             |
|---|---------------------------------|------|---------|---------|-----------------|---------------------------------------------------------------------------------------------------------------------|-------------------------------------------------------------------------------|-----------------------------------------------------------------------------------------------------|
| 1 | Yu CJ <sup>9)</sup>             | 1996 | human   | lung    | 60              | To elucidate the clinical significance of mucin gene overexpression in lung cancer                                  | Slot-blot analysis and immunohistochemistry in surgical specimens of NSCLC    | Associated with relapse (p= 0.0015) and lower DFS (p= 0.0037)                                       |
| 2 | Pinto-de-Sousa J <sup>10)</sup> | 2004 | human   | gastric | 50              | To elucidate the clinical significance of mucin gene overexpression in gastric cancer                               | Immunohistochemistry in surgical specimens of gastric carcinomas              | No significance (p= 0.59)                                                                           |
| 3 | Varangot M <sup>11)</sup>       | 2005 | human   | breast  | 80              | To evaluate the prognostic value of MUC5B mRNA expression in bone marrow aspirates                                  | Multimarker RT-PCR assay in pre-operative bone marrow aspirates               | Unexpected favorable clinical outcome.                                                              |
| 4 | Partheen K <sup>12)</sup>       | 2006 | human   | ovarian | 54              | In order to find novel candidate biomarkers                                                                         | Microarray (with hierarchical cluster analysis) and quantitative RT-PCR assay | A hierarchical sub-group that included 60% of the survivors shows higher mRNA expression (p< 0.001) |
| 5 | Valque H <sup>13)</sup>         | 2012 | mouse   | breast  | 22              | To understand better the implication of MUC5B in cancer pathogenesis                                                | Histological and immunological analysis                                       | Correlate with poor survival with no significance (p= 0.08)                                         |
| 6 | Nagashio R <sup>14)</sup>       | 2015 | human   | lung    | 247             | To evaluate the relationships between MUC5B expression in tumor cells and the clinicopathological parameters of ACs | Immunohistochemistry in surgical specimens of NSCLC                           | Significantly associated with poorer survival (p= 0.017)                                            |

Definition of abbreviations: NSCLC = non-small cell lung cancer; DFS = disease-free survival; RT-PCR = reverse transcription-polymerase chain reaction; OS = overall survival; RFS = relapse-free survival; HR = hazard ratio; ACs = adenocarcinomas.
